# Supplementary material
Source: PubMed Central journal article supplement (PMC6780667)
Supplement: ajcr0009-1957-f7.pdf [file ajcr0009-1957-f7.pdf]

# The anti-tumor role of Shp2 on tumor-associated macrophages in colorectal cancer

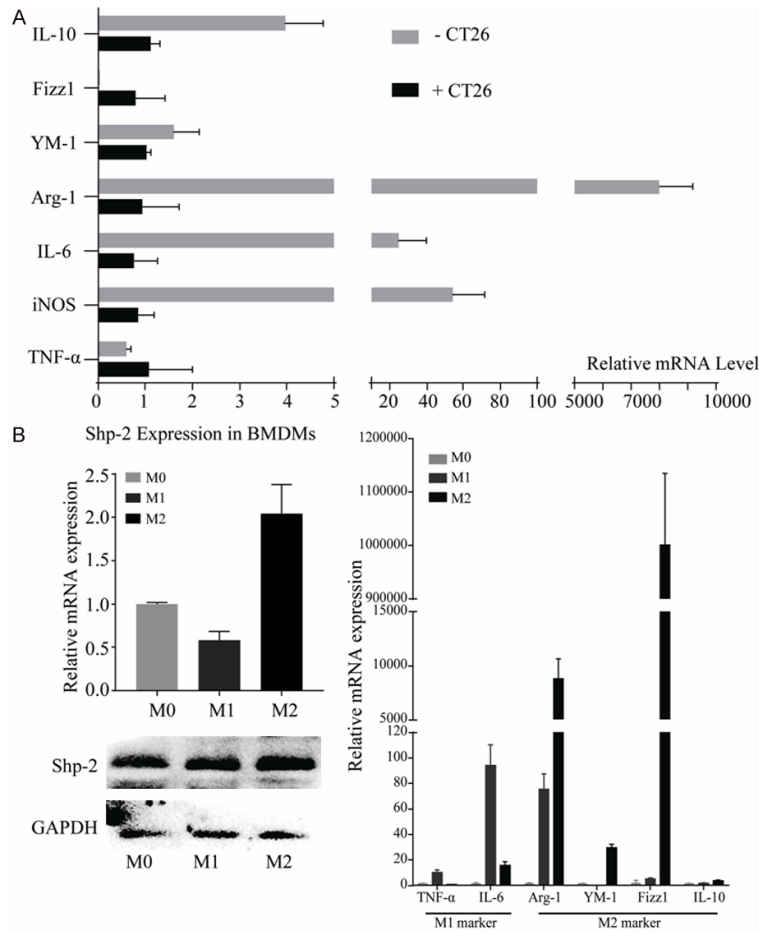

**Supplementary Figure 1.** There was no difference of Shp2 expression in M1 macrophages and M2 macrophages. A. BMDMs were co-cultured with CT26 cells for 24 hours before RNA was collected to determine the iNOS, IL-6, TNF- $\alpha$ , Arg-1, Fizz1, YM-1 and IL-10 expressions. B. BMDMs were stimulated with LPS (10 ng/mL) plus IFN- $\gamma$  (20 ng/mL) (polarized to M1) or IL-4 (20 ng/mL) (polarized to M2) for 24 hours before RNA or proteins were extracted. The expressions of Shp2, IL-6, TNF- $\alpha$ , Arg-1, Fizz1, YM-1 and IL-10 were determined. Results were obtained from 3 independent experiments and are expressed as the means  $\pm$  SEM.

## The anti-tumor role of Shp2 on tumor-associated macrophages in colorectal cancer

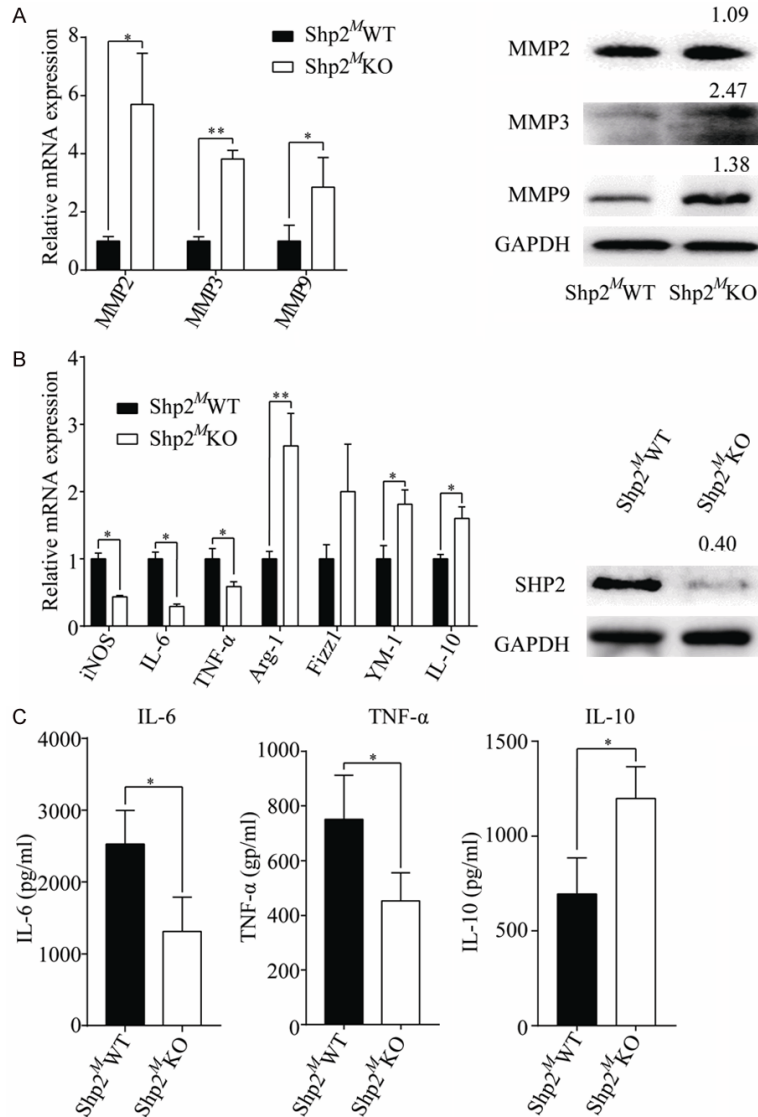

**Supplementary Figure 2.** Knock out of Shp2 on macrophages promotes MMPs expressions on CT26 cells and M2-like polarization of TAMs in TME. (A) CT26 cells were direct co-cultured with Shp2<sup>M</sup>WT or Shp2<sup>M</sup>KO BMDMs for 24 hours before macrophages were isolated by anti-F4/80 microbeads and then CT26 cells were collected for RNA or protein extraction. The mRNA or protein expressions of MMP2, MMP3 and MMP9 were determined by RT-qPCR or western blotting, respectively. (B) CT26 cells were direct co-cultured with BMDMs isolated from Shp2<sup>M</sup>WT or Shp2<sup>M</sup>KO mice for 24 hours, (B) BMDMs were collected for RNA extraction and mRNA expressions of iNOS, IL-6, TNF- $\alpha$ , Arg-1, Fizz1, YM-1 and IL-10 were determined by RT-qPCR. (C) Supernatants were collected for ELISA to determine the IL-6, TNF- $\alpha$  and IL-10 production. Results were obtained from 3 independent experiments and are expressed as the means  $\pm$  SEM. \*P < 0.05, \*\*P < 0.01.

## The anti-tumor role of Shp2 on tumor-associated macrophages in colorectal cancer

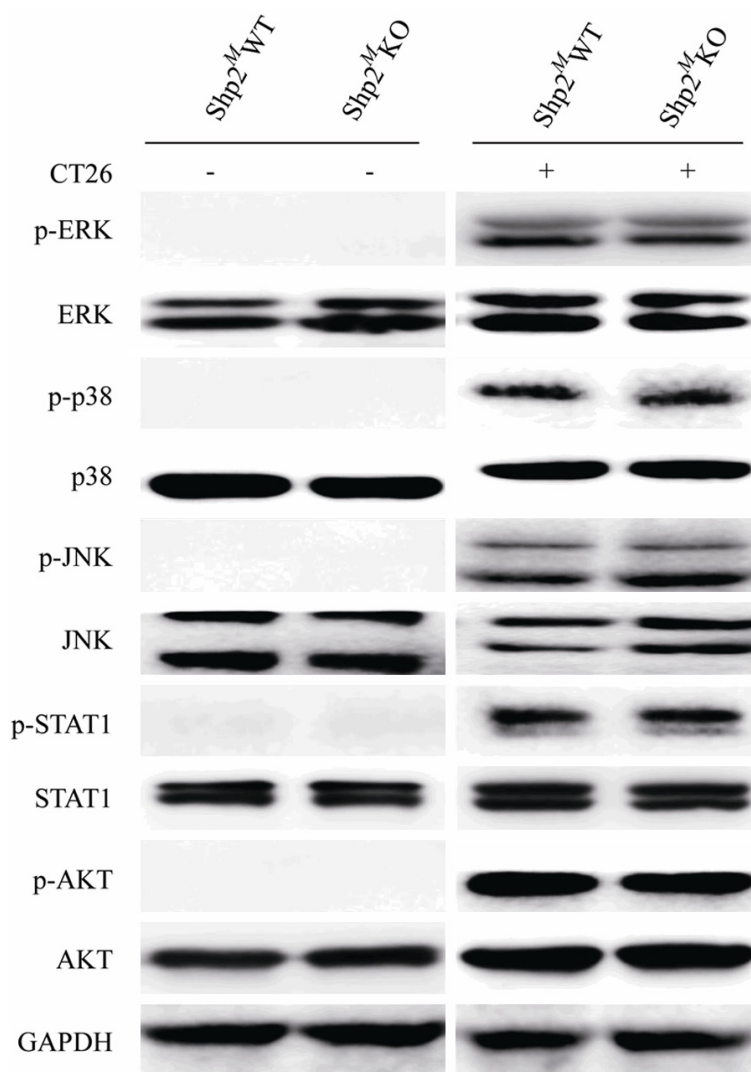

**Supplementary Figure 3.** Deletion of Shp2 on TAMs has no effects on the activation of MAPKs, STAT1 and AKT. CT26 cells were in-direct co-cultured with BMDMs isolated from Shp2<sup>M</sup>WT or Shp2<sup>M</sup>KO mice for 24 hours before proteins were extracted from BMDMs for western blot analysis to detect the p-ERK, ERK p-P38, P38, p-JNK, JNK, p-AKT, AKT, p-STAT1 and STAT1 expression levels. Results were representative of 3 independent experiments.
